# Supplementary material
Source: publisher figshare collection journal article supplement (https://frontiersin.figshare.com/ndownloader/files/28670928)
Supplement: Supplementary file [file 28670928]

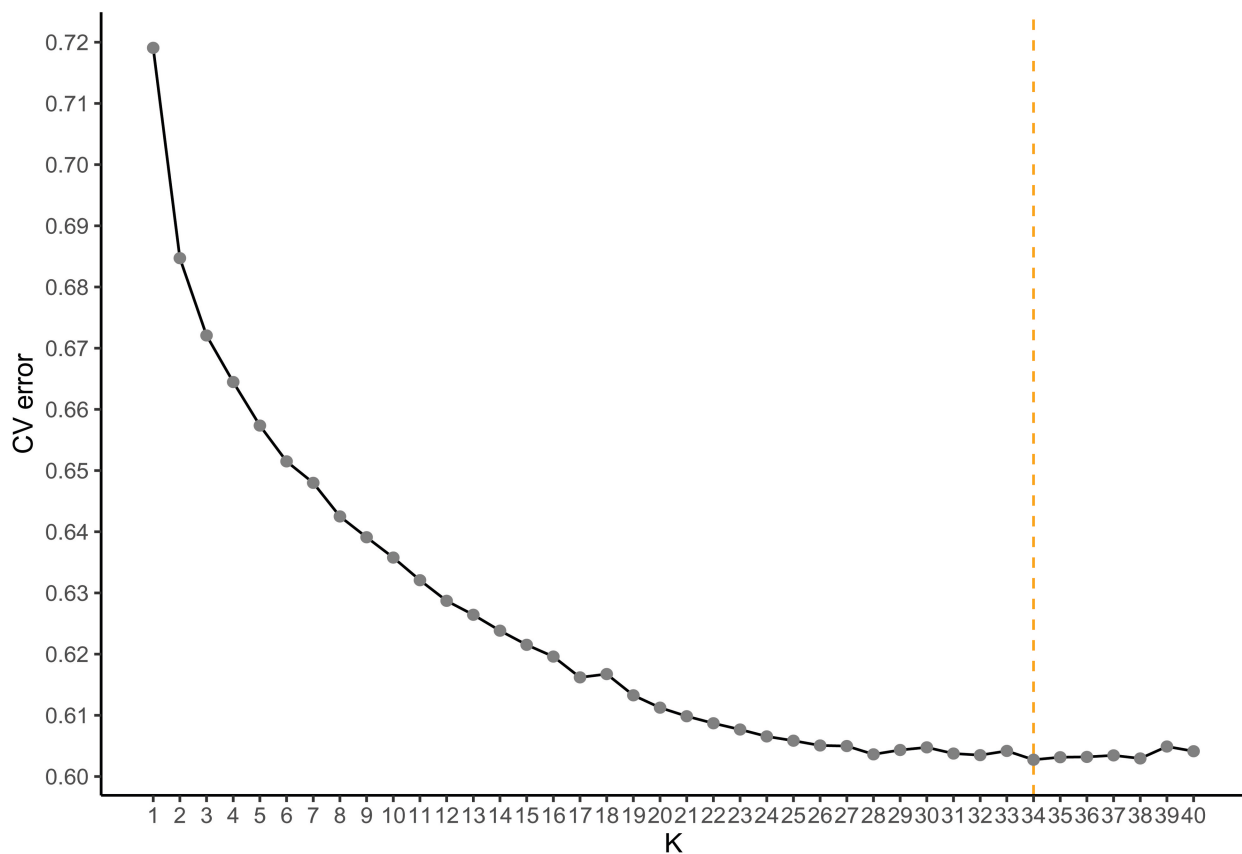

**Supplementary Figure 5.** Plot of CV errors of K-values for each K from 1 to 40 for Russian and worldwide goat populations from the AdaptMap dataset. K=34 was suggested as the most likely number of clusters.
